# Supplementary material for: Inactivation of HMGCL promotes proliferation and metastasis of nasopharyngeal carcinoma by suppressing oxidative stress
Source: PubMed Central journal article supplement (PMC5607293; doi:10.1038/s41598-017-11025-2), 2017-09-20
Supplement: 41598_2017_11025_MOESM1_ESM.pdf [file 41598_2017_11025_MOESM1_ESM.pdf]

# **Inactivation of HMGCL promotes proliferation and metastasis of nasopharyngeal carcinoma by suppressing oxidative stress**

Wenqi Luo<sup>#1</sup>, Liting Qin<sup>#1</sup>, Bo Li<sup>2</sup>, Zhipeng Liao<sup>3</sup>, Jiezhen Liang<sup>3</sup>, Xiling Xiao<sup>3</sup>, Xue Xiao<sup>3</sup>, Yingxi Mo<sup>4</sup>, Guangwu Huang<sup>3</sup>, Zhe Zhang<sup>3</sup>, Ping Li<sup>1\*</sup> and Xiaoying Zhou<sup>\*5</sup>

<sup>1</sup>Department of Pathology, First Affiliated Hospital of Guangxi Medical University, Nanning, China

<sup>2</sup>Department of Radiotherapy, First Affiliated Hospital of Guangxi Medical University, Nanning, China

<sup>3</sup>Department of Otolaryngology-Head & Neck Surgery, First Affiliated Hospital of Guangxi Medical University, Nanning, China

<sup>4</sup>Department of Research, Affiliated Tumor Hospital of Guangxi Medical University, Nanning, China

<sup>5</sup>Life Science Institute, Guangxi Medical University, Nanning, China

#The first two authors contributed equally to this work.

\*Correspondence to: Ping Li & Xiaoying Zhou

## Supplementary Figure 1

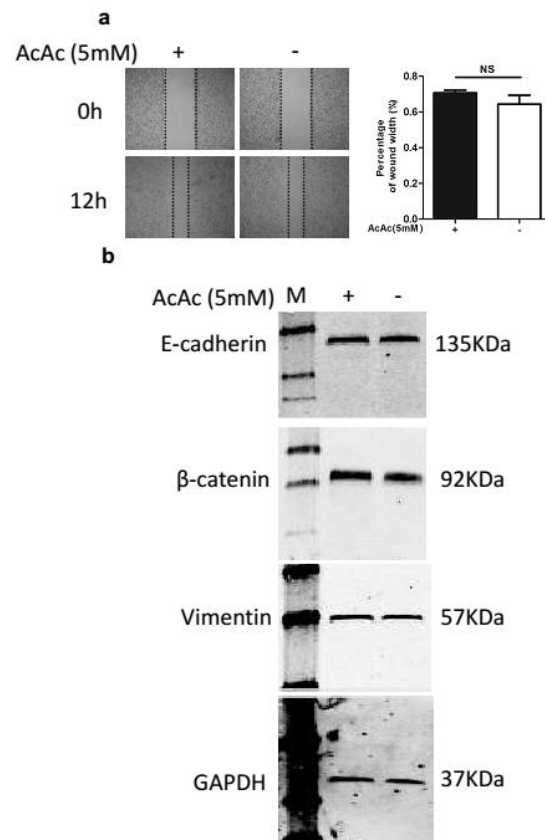

Supplementary Figure Legend 1:

**The motility of 5-8F cells does not affected by acetoacetate (AcAc).** (a) The migration of 5-8F cells upon the treatment of 5mM lithium acetoacetate (Li-AcAc, Sigma Aldrich, # A8509) was analyzed by wound healing assay. (b) Western blot analysis of the expression of three key molecules involved in EMT, E-cadherin,  $\beta$ -catenin and Vimentin. GAPDH was an internal control. Data are mean $\pm$ SD (n=3).

Supplementary Figure 2

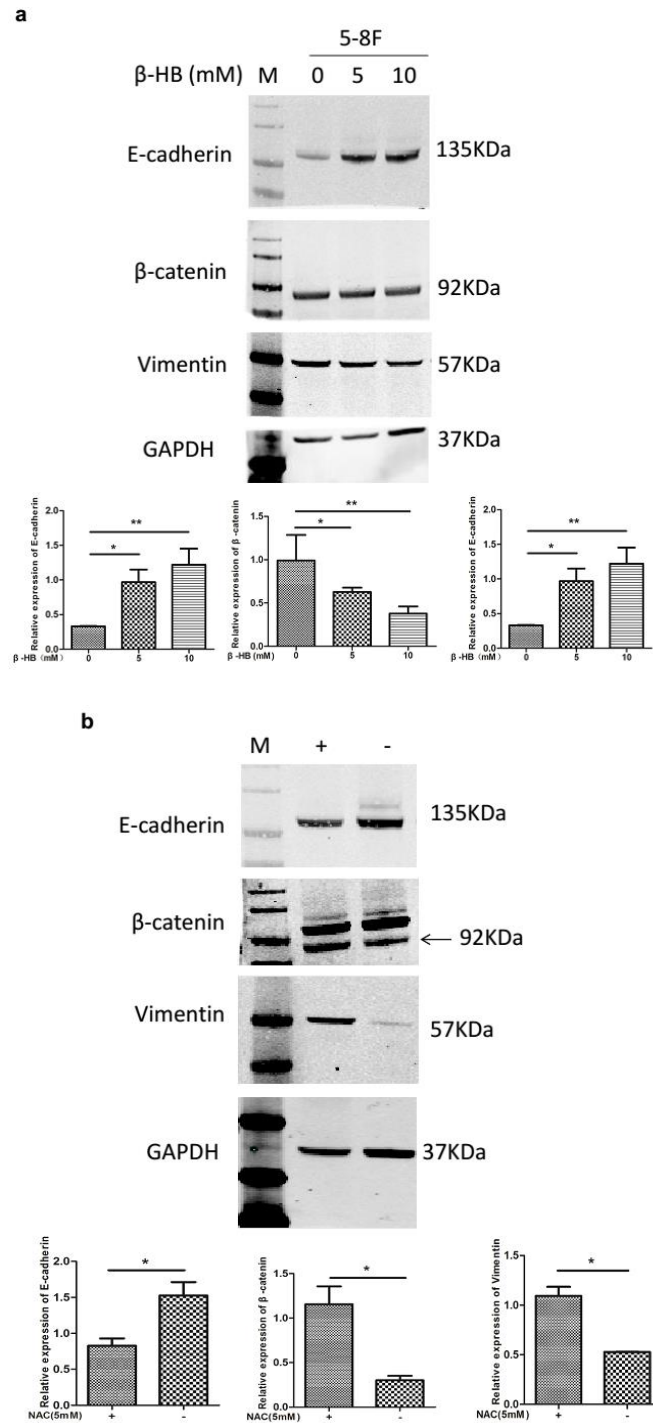

Supplementary Figure Legend 2:

**Exogenous β-HB treatment promotes the mesenchymal-epithelial transition (MET) in 5-8F cells. NAC reversed the MET functioned by HMGCL in HMGCL-5-8F cells.** (a) Western blot analysis of the expression of three key molecules involved in E-cadherin, β-catenin and Vimentin in 5-8F treated by β-HB (0mM, 5mM and 10mM) for

24 h. (b) EMT markers were analyzed by western blot in HMGCL-5-8F cells treated with NAC (0mM, 5mM) for 24 h. GAPDH was an internal control. Data are mean  $\pm$ SD (n=3). (\*p<0.05; \*\*p<0.01)
